# Supplementary material
Source: PubMed Central journal article supplement (PMC3711841)

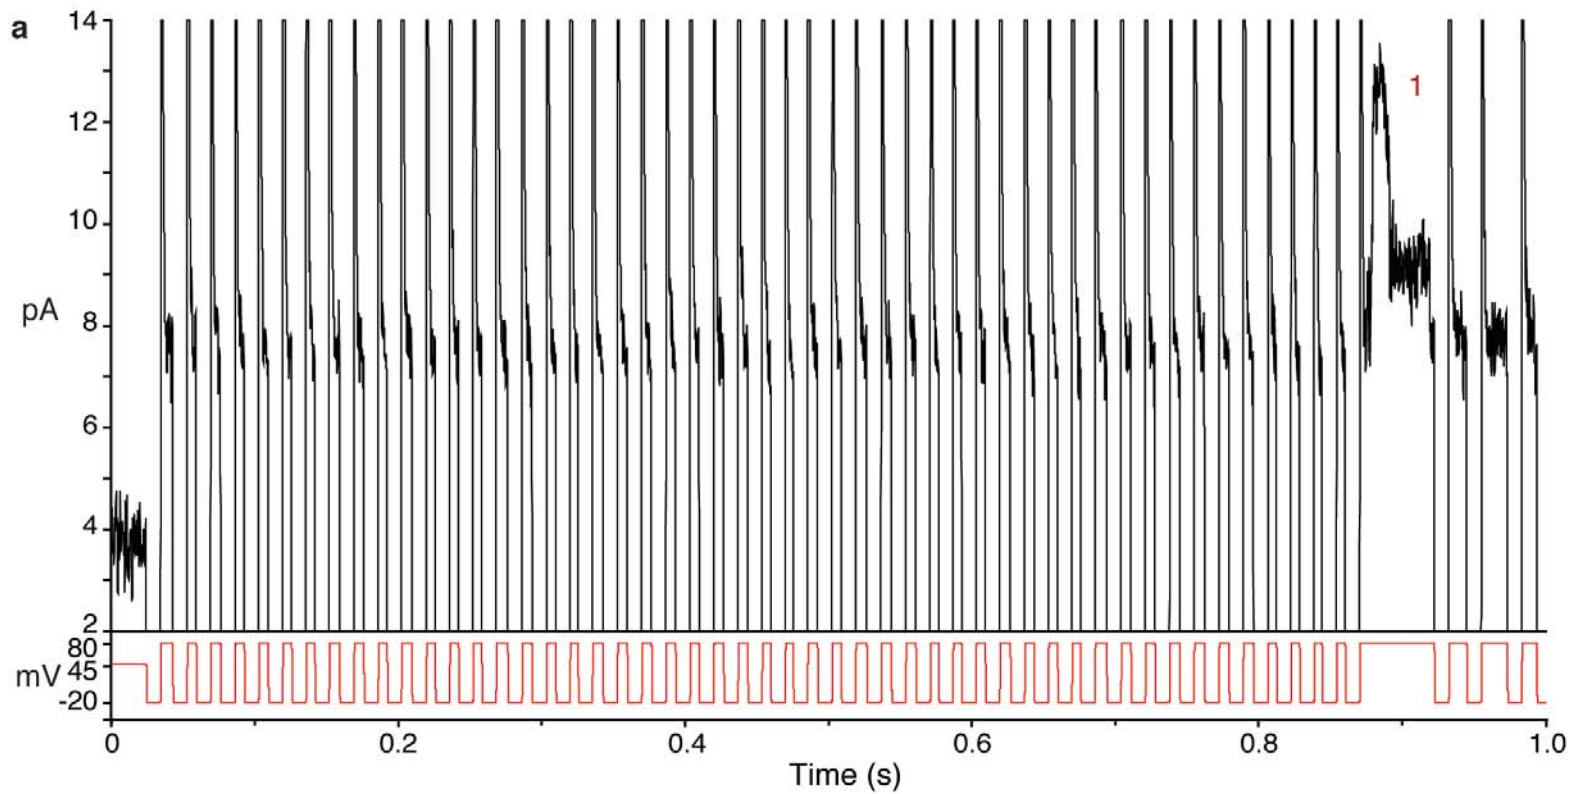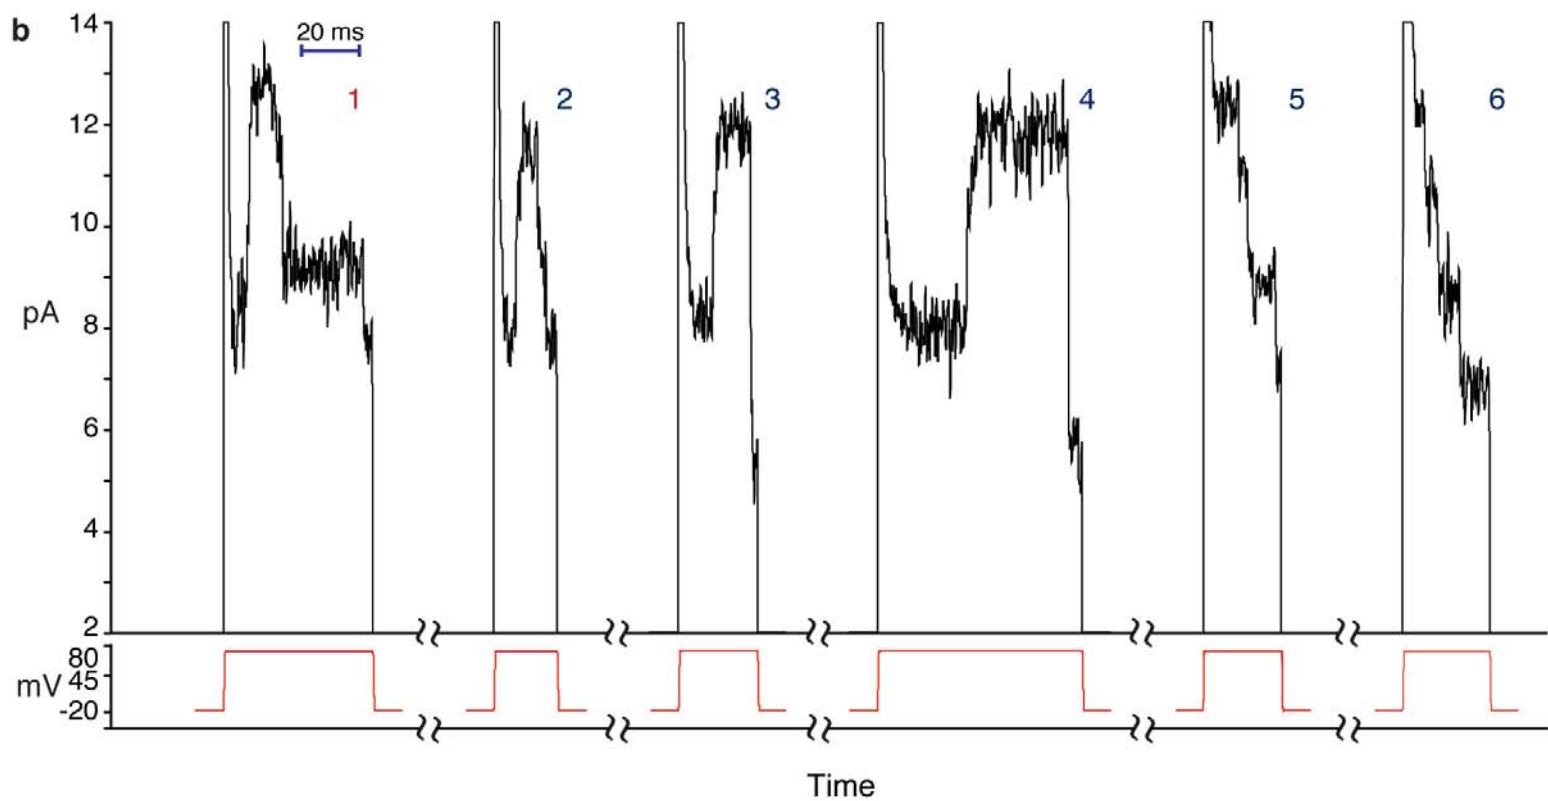

Supplement: NIHMS226888-supplement-figure_1.pdf [file NIHMS226888-supplement-figure_1.pdf]

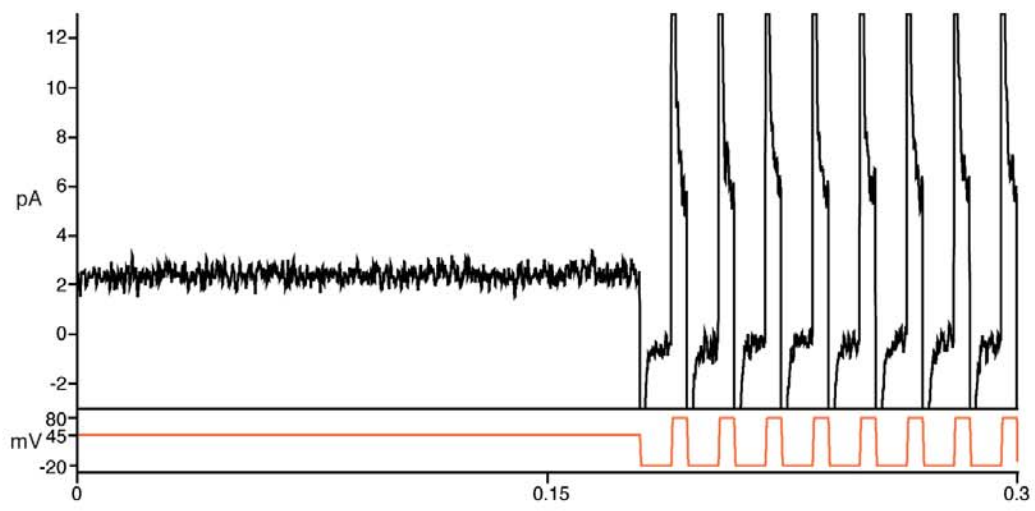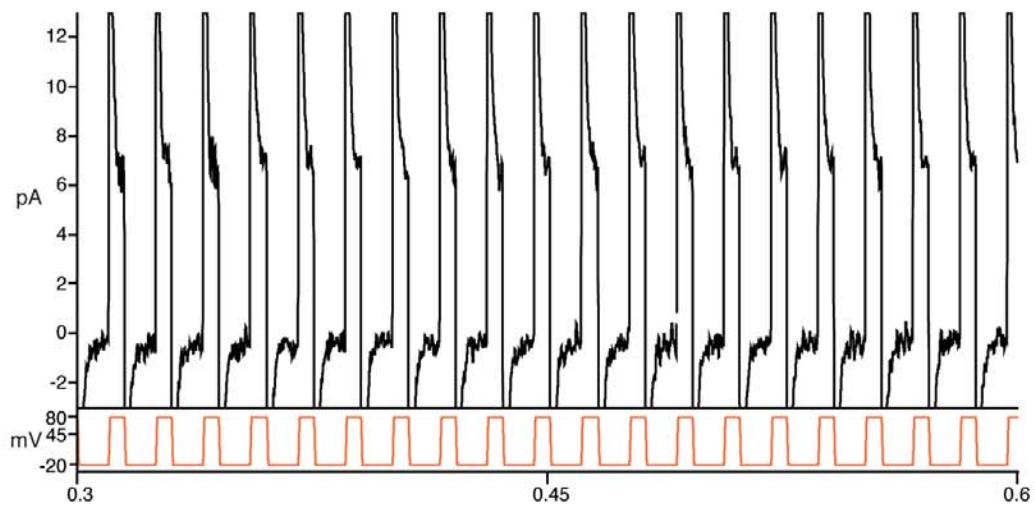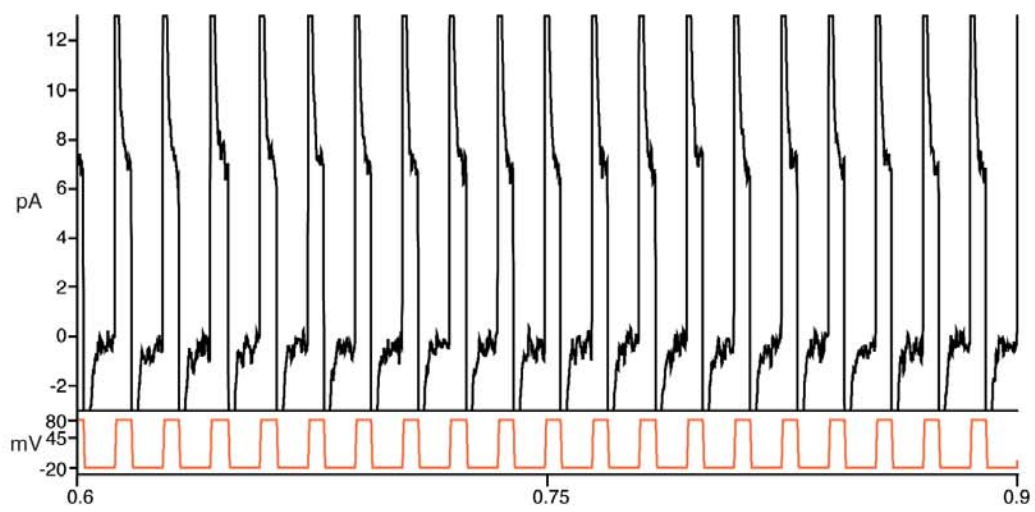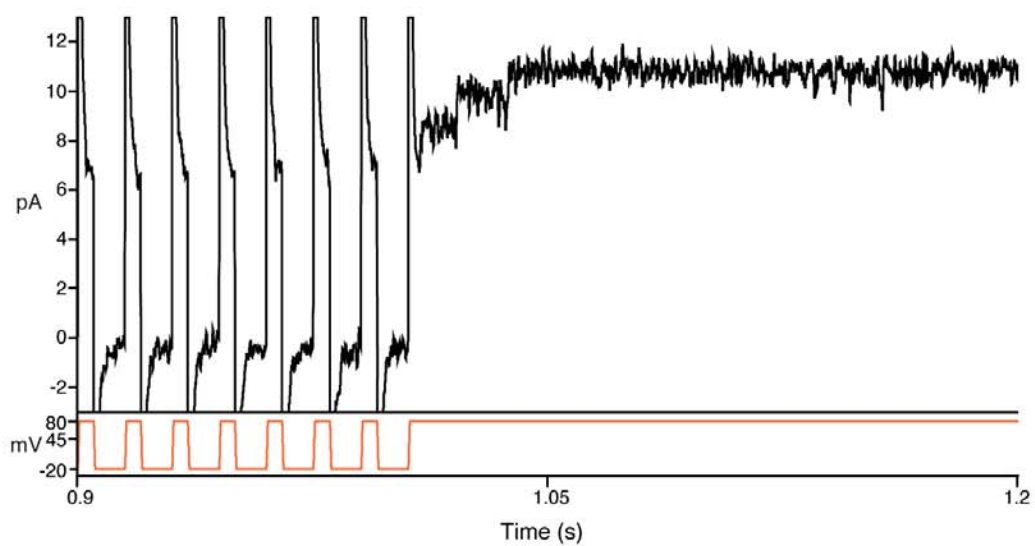

Supplement: NIHMS226888-supplement-figure_2.pdf [file NIHMS226888-supplement-figure_2.pdf]

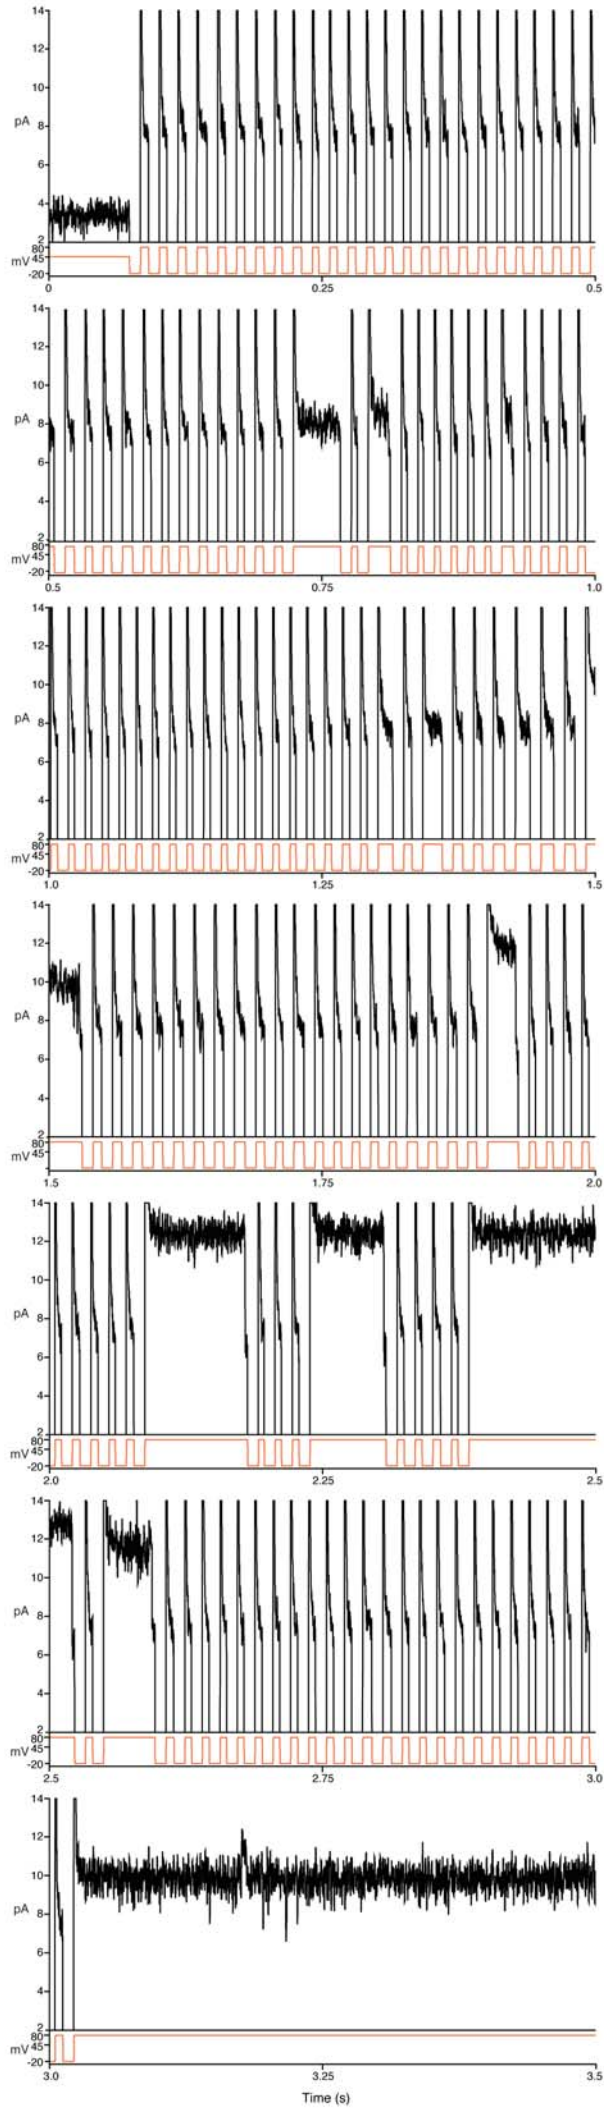

Supplement: NIHMS226888-supplement-figure_3.pdf [file NIHMS226888-supplement-figure_3.pdf]
